# Supplementary material for: pH/magnetic dual responsive Pickering emulsion stabilized by Fe3O4@SiO2@chitosan nanoparticles
Source: Royal Society of Chemistry journal article supplement (doi:10.1039/d3cp03400c), 2023-01-01
Supplement: d3cp03400c1.pdf [file d3cp03400c1.pdf]

*Supporting Information for*

**pH/ magnetic dual responsive Pickering emulsion stabilized  
by Fe<sub>3</sub>O<sub>4</sub>@SiO<sub>2</sub>@chitosan Particles**

Runna He<sup>1</sup>, Shuangqing Sun<sup>1,2\*</sup>, Jianpeng Cui<sup>1</sup>, Mingshuo Chi<sup>1</sup>, Zhikun Wang<sup>1,2</sup>,  
Songqing Hu<sup>1,2</sup>

<sup>1</sup> *School of Materials Science and Engineering, China University of Petroleum (East  
China), Qingdao 266580, PR China*

<sup>2</sup> *Institute of Advanced Materials, China University of Petroleum (East China),  
Qingdao 266580, PR China*

In the solution with  $\text{pH} > 2$ , chitosan completely falls off from the surface of solid particles to form  $\text{Fe}_3\text{O}_4@\text{SiO}_2$  + chitosan compound system. With the change of solution acidity and alkalinity,  $\text{Fe}_3\text{O}_4@\text{SiO}_2$  has no obvious change with the change of solution acidity and alkalinity, but chitosan will change from chain segments to agglomerated nanoparticles after  $\text{pH} > \text{pKa}$  according to its own characteristics, as shown in Fig. S1.

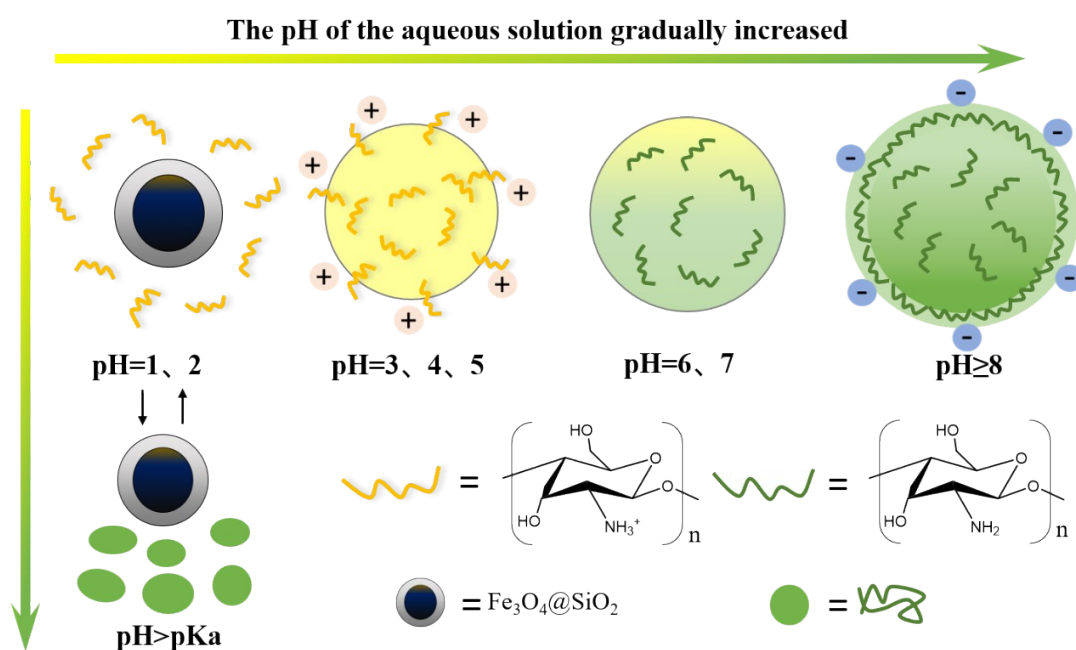

**Fig.S1 Schematic representation of chitosan changes on  $\text{Fe}_3\text{O}_4@\text{SiO}_2@\text{CS}$  particles at different pH values (especially after  $\text{pH}=1$  or  $2$ ) in aqueous solutions.**

Fig. S2 shows the results of cyclic test from pH=2 to pH=12. It was evident that all formed stable emulsions and none of them respond magnetically to break emulsions. However, after the magnetic response in acidic conditions, most solid particles can still aggregate to one side under the action of a magnetic field, and the emulsion turns white; In neutral or alkaline conditions, emulsion droplets will move under a magnetic field without breaking emulsions. It was concluded that Pickering emulsions lost pH and magnetic responsive emulsions breaking ability.

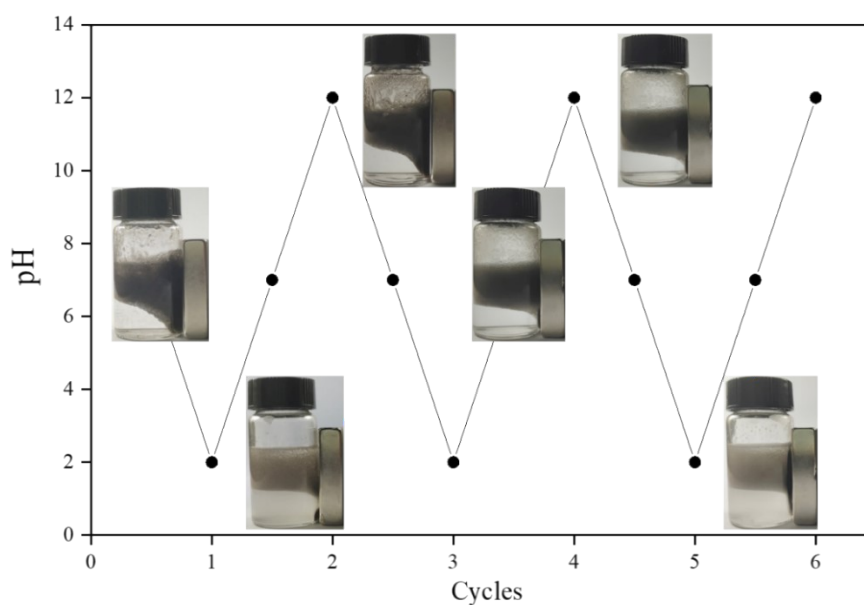

**Figure.S2 Macroscopic images of emulsion cycling in response to changes in pH (2-12) and magnetic field.**

In Fig S3 for an explanation of the cycling mechanism. In acidic conditions, the segments formed by the complete protonation of chitosan extended stretching in the aqueous phase because of the higher concentration of  $H^+$  in the solution. It is used as a polymer to reduce the surface tension of the aqueous phase, plus  $Fe_3O_4@SiO_2$  Solid particle stabilized emulsion; In neutral or alkaline conditions, the agglomerated chitosan nanoparticles with  $Fe_3O_4@SiO_2$  Co action stabilizes emulsions. Even if a magnetic field is applied so that the particles leave the oil-water interface, the chitosan particles can still stabilize the interface independently.

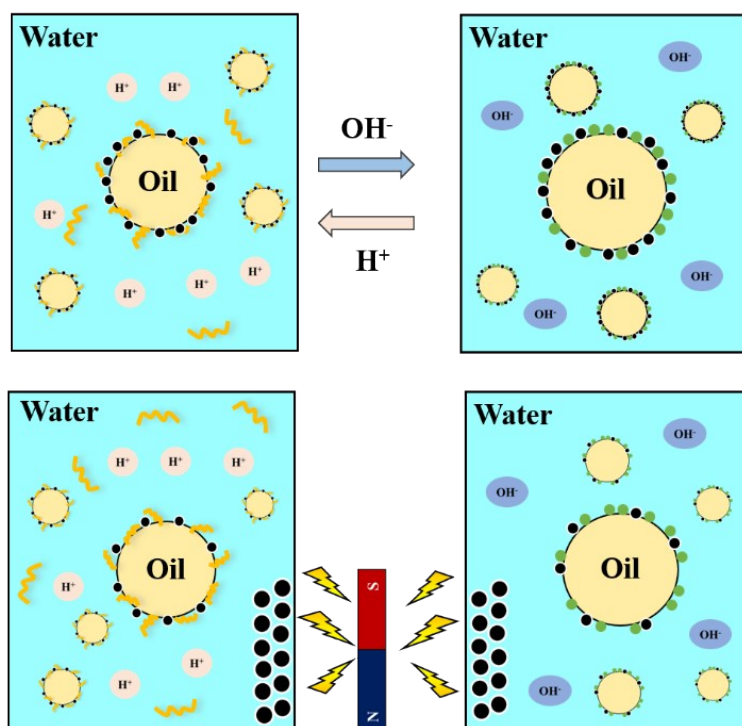

**Figure. S3 Schematic illustration of the pH/magnetic dual responsive emulsification and demulsification mechanism of the Pickering emulsifier at pH 2-12.**
